# Supplementary material for: High-performance photovoltaic application of the 2D all-inorganic Ruddlesden–Popper perovskite heterostructure Cs2PbI2Cl2/MAPbI3
Source: Royal Society of Chemistry journal article supplement (doi:10.1039/d1cp03375a), 2021-01-01
Supplement: d1cp03375a1.pdf [file d1cp03375a1.pdf]

## Supplementary Information:

### **High-performance photovoltaic device for the 2D all-inorganic Ruddlesen-Popper perovskite heterostructure $\text{Cs}_2\text{PbI}_2\text{Cl}_2/\text{MAPbI}_3$**

Ling-Yu Pan, Yu-Feng Ding, Huang-Qing Liu\*, Meng-Qiu Cai\*

*Key Laboratory for Micro/Nano Optoelectronic Devices of Ministry of Education &  
Hunan Provincial Key Laboratory of Low-Dimensional Structural Physics and  
Devices, School of Physics and Electronics, Hunan University, Changsha 410082,  
China*

---

\*Corresponding author. E-mail address: liuhq@hnu.edu.cn(H. Q. Liu) ;

[mqcai@hnu.edu.cn](mailto:mqcai@hnu.edu.cn)(M. Q. Cai)

**Table S1.** The calculated lattice parameters of 2D Cs<sub>2</sub>PbI<sub>2</sub>Cl<sub>2</sub> monolayer, 3D MAPbI<sub>3</sub> slab, and 2D/3D heterostructure. The a and b stand for the lattice direction.

|          | 2D Cs <sub>2</sub> PbI <sub>2</sub> Cl <sub>2</sub> (Å) | 3D MAPbI <sub>3</sub> (Å) | 2D/3D Her. (Å) |
|----------|---------------------------------------------------------|---------------------------|----------------|
| <b>a</b> | 5.64                                                    | 8.80                      | 8.37           |
| <b>b</b> | 5.64                                                    | 8.80                      | 8.37           |

**Table S2.** Calculated band gaps of 2D monolayer/3D MAI terminated and 2D trilayer/3D MAI terminated heterostructures using the PBE method , respectively.

|                                 | E <sub>g</sub> (eV) |
|---------------------------------|---------------------|
| <b>2D monolayer/3D MAI Her.</b> | 1.20                |
| <b>2D trilayer/3D MAI Her.</b>  | 1.19                |

**Table S3.** The work function before and after compression of 2D Cs<sub>2</sub>PbI<sub>2</sub>Cl<sub>2</sub>., 3D MAI-terminated and 3D PbI-terminated.

|                           | 2D (eV) | 3D-MAI (eV) | 3D-PbI (eV) |
|---------------------------|---------|-------------|-------------|
| <b>Before compression</b> | 4.88    | 4.09        | 5.21        |
| <b>After compression</b>  | 4.97    | 3.57        | 5.49        |

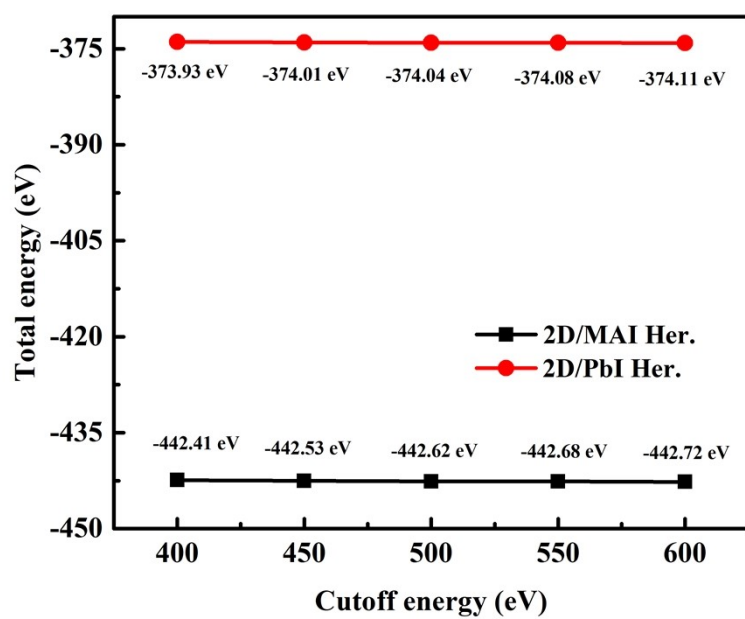

**Fig. S1** The total energy of 2D/MAI and 2D/PbI heterostructures for various energy cutoffs.

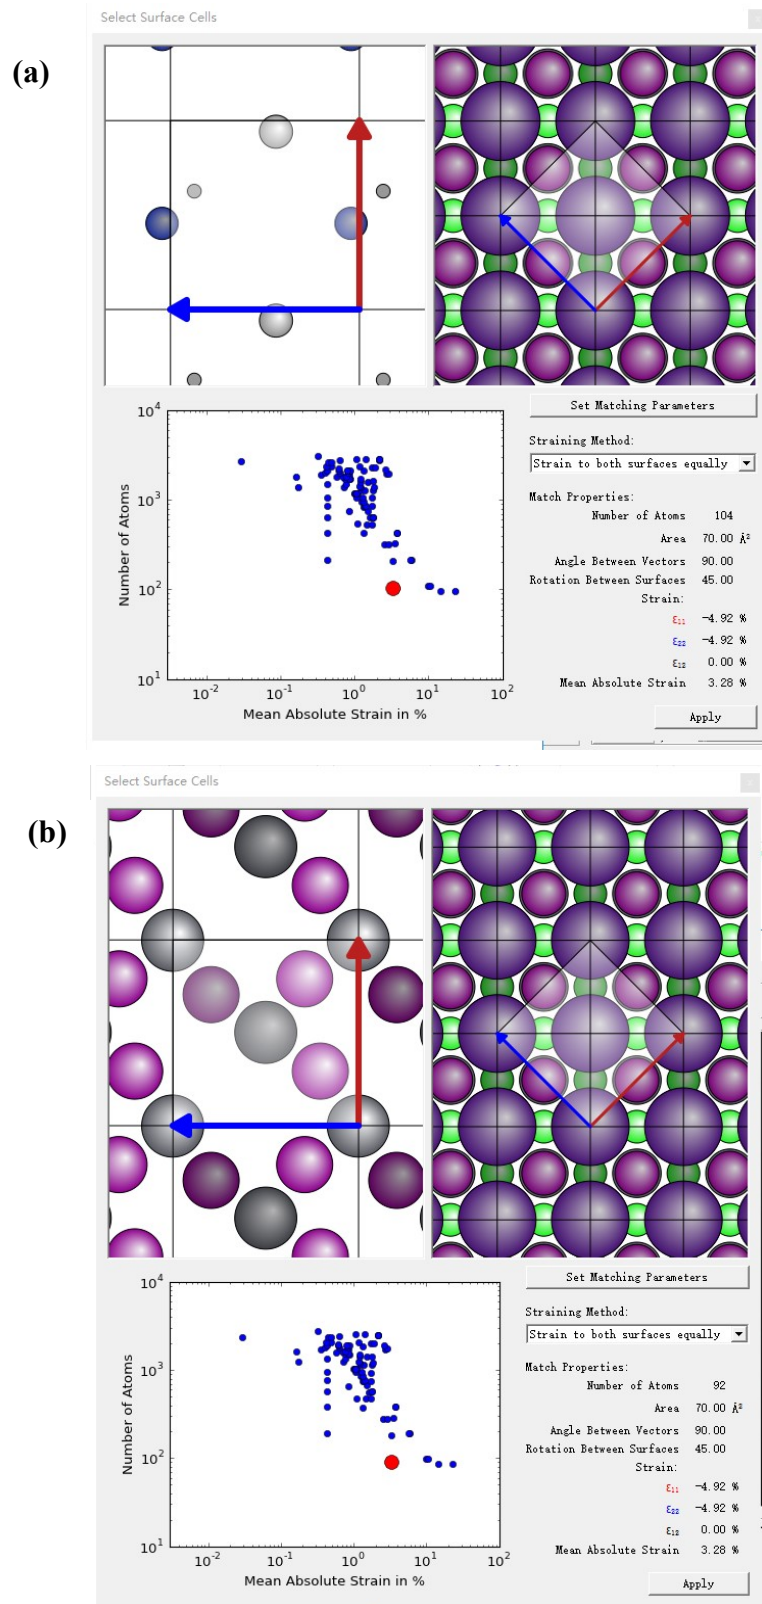

**Fig. S2** The different match between the 2D  $\text{Cs}_2\text{PbI}_2\text{Cl}_2$  monolayer and (a) 3D MAI-terminated, (b) 3D PbI-terminated. The red dot present the supercell dimension with the minimum number of atoms and mean absolute strain.

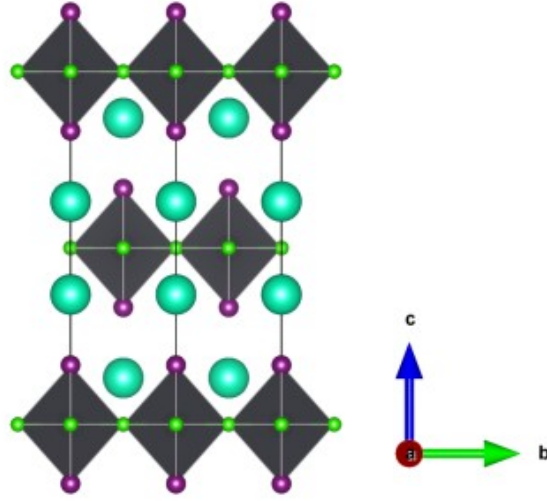

**Fig. S3** The periodic structure of 2D  $\text{Cs}_2\text{PbI}_2\text{Cl}_2$ .

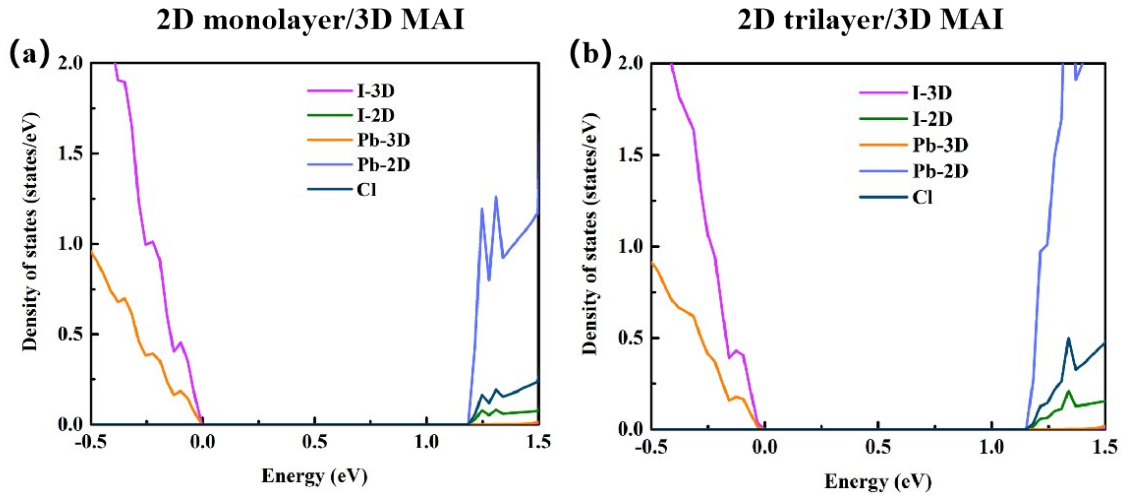

**Fig. S4** Calculated projected density of states (PDOS) of (a) 2D monolayer/3D MAI terminated and (b) 2D trilayer/3D MAI terminated heterostructures using the PBE method, where I-3D, I-2D, Pb-3D and Pb-2D represent I atom in 3D  $\text{MAPbI}_3$ , I atom in 2D  $\text{Cs}_2\text{PbI}_2\text{Cl}_2$ , Pb atom in 3D  $\text{MAPbI}_3$  and Pb atom in 2D  $\text{Cs}_2\text{PbI}_2\text{Cl}_2$ , respectively.

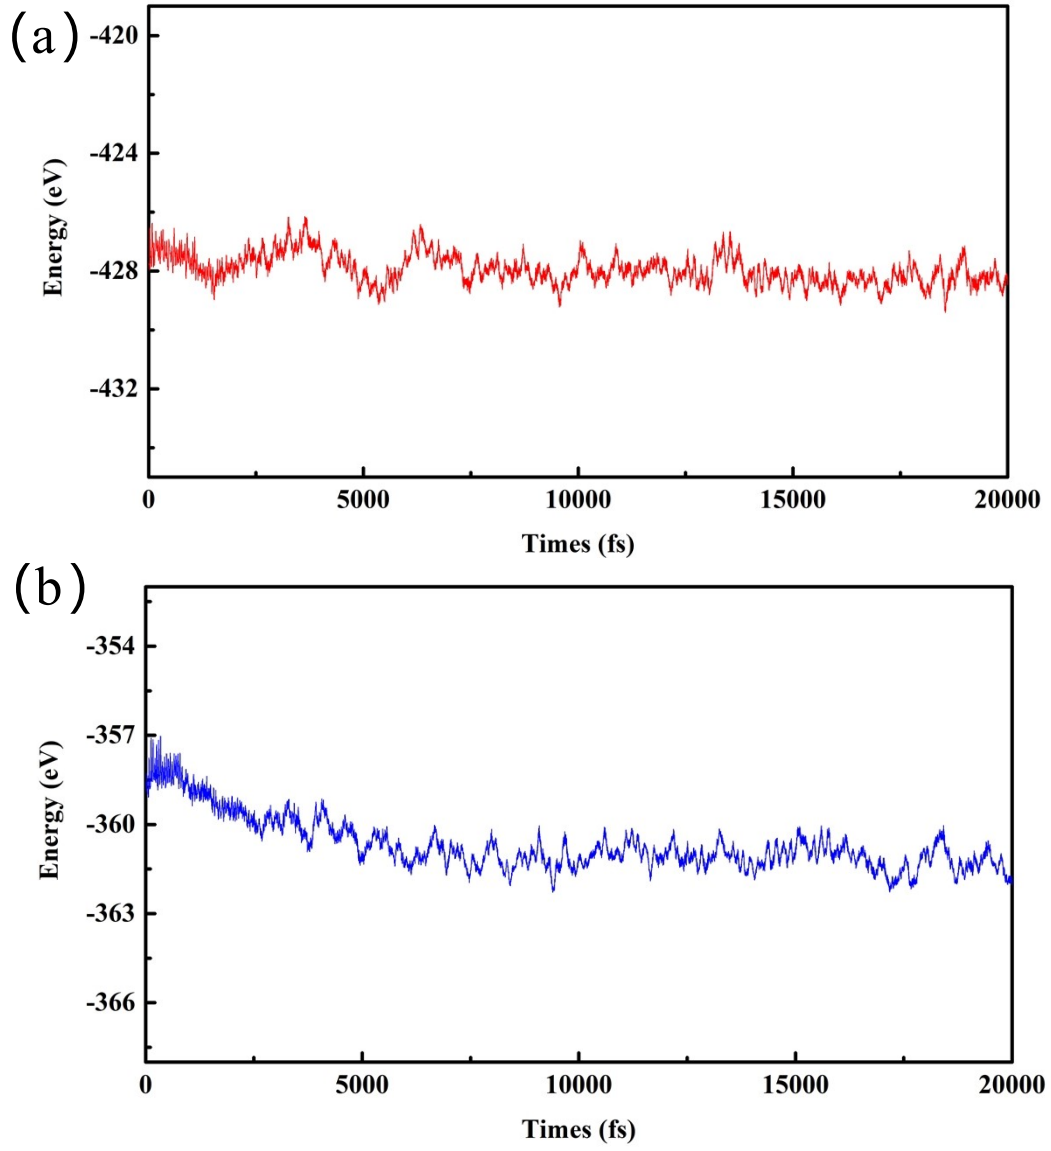

**FIG. S5** Variations of the energy against the time for AIMD simulations of (a) 2D/MAI and (b) 2D/PbI heterostructures. The simulation is run under 298.15 K and the time step is 1 fs.

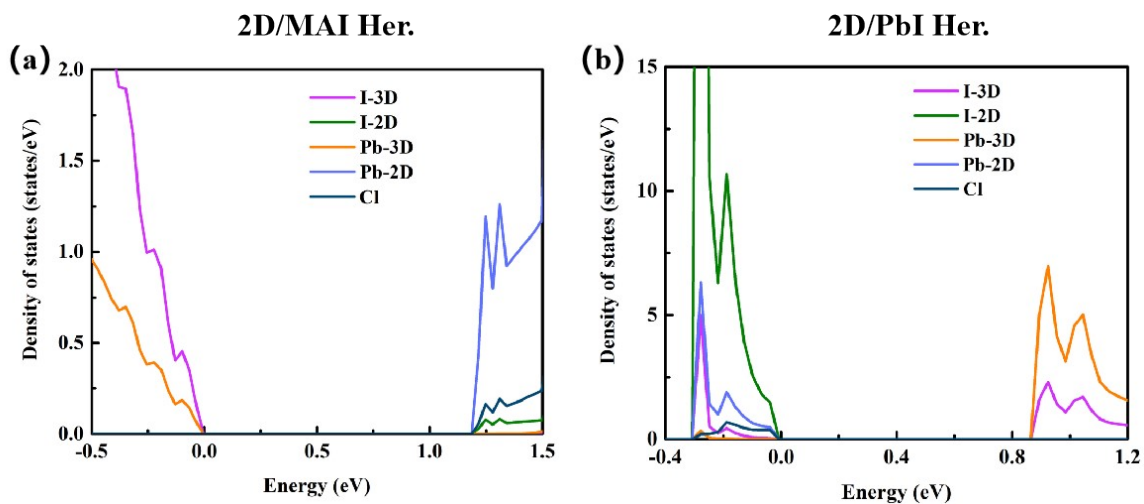

**Fig. S6** Calculated projected density of states (PDOS) of (a) 2D/MAI and (b) 2D/PbI

heterostructures using the PBE method.

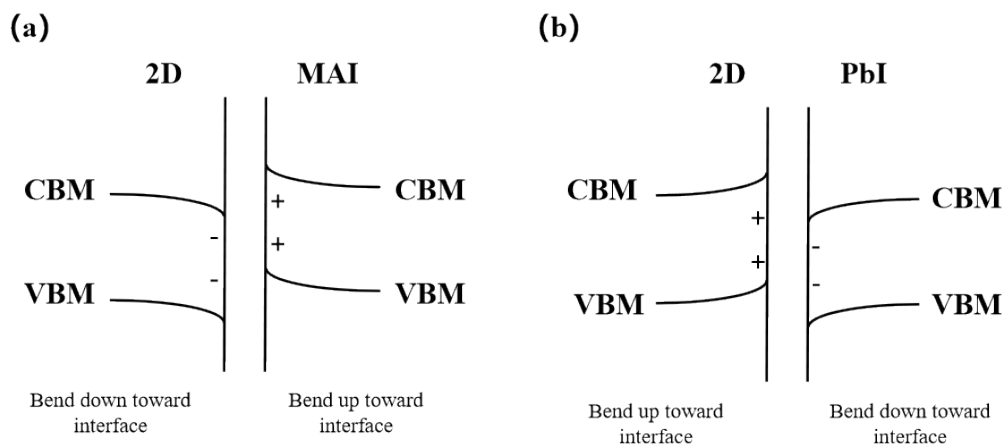

**Fig. S7** The band bending diagrams of (a) 2D/MAI and (b) 2D/PbI heterostructures, respectively.
